# Supplementary figures and images for: Transcriptional Repressor Gfi1 Integrates Cytokine-Receptor Signals Controlling B-Cell Differentiation
Source: PLOS journal article supplement (doi:10.1371/journal.pone.0000306), 2007-03-20

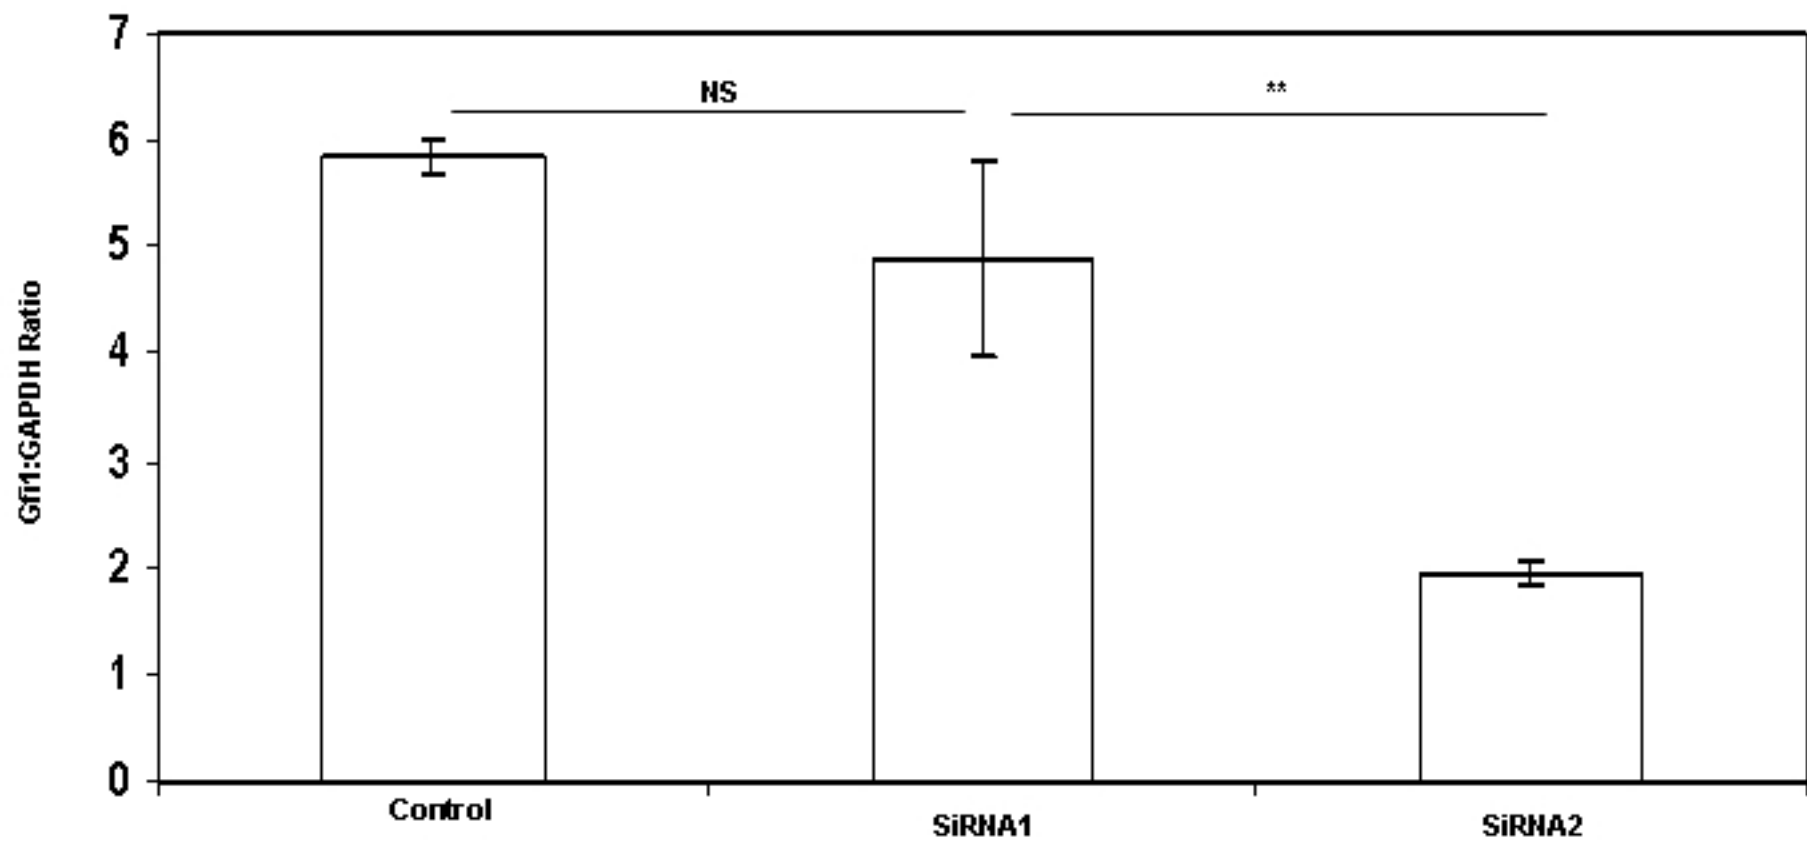

Supplementary Figure 2.

Supplement: S2 (10.1371/journal.pone.0000306.s002) [file journal.pone.0000306.s002]
